# Supplementary material
Source: PubMed Central journal article supplement (PMC2667750)

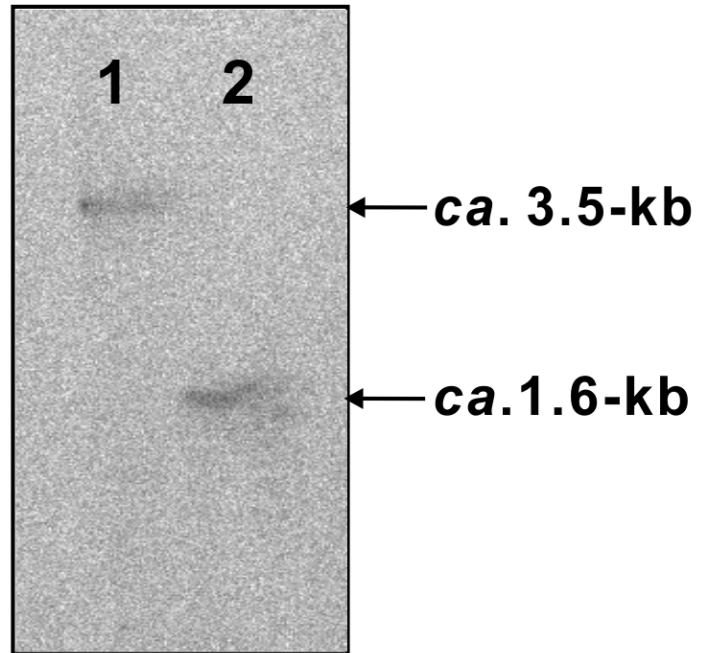

**Figure S1.**

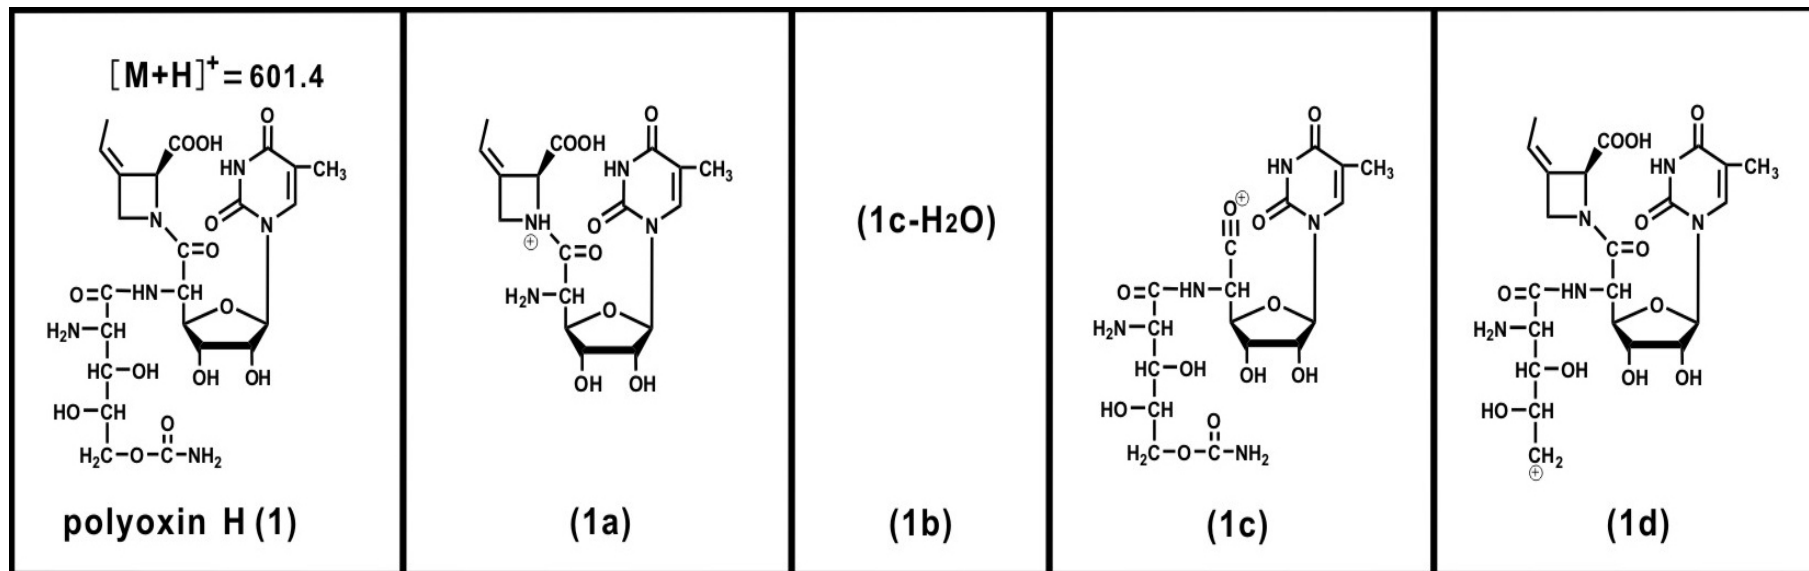

Figure S2.

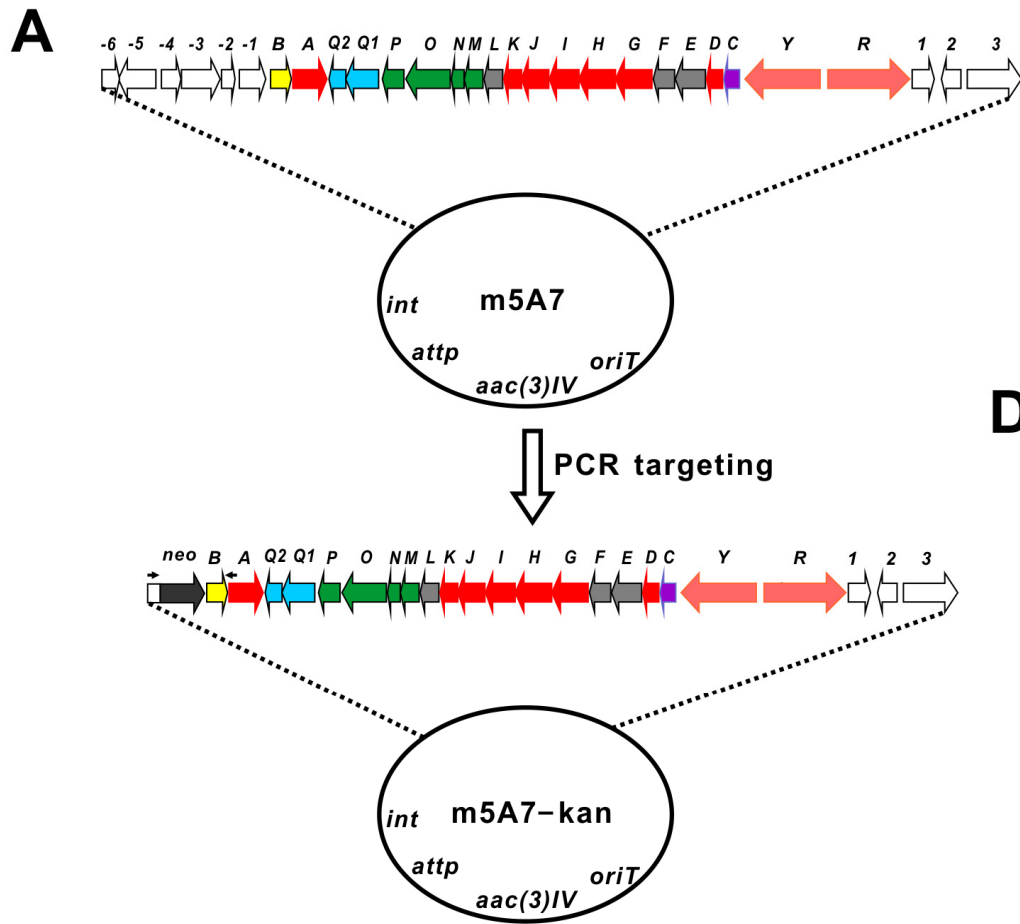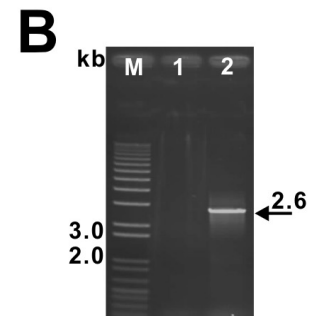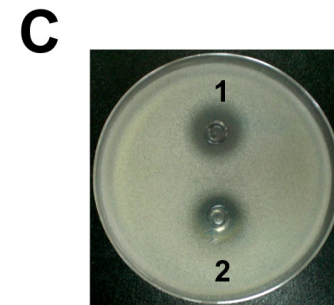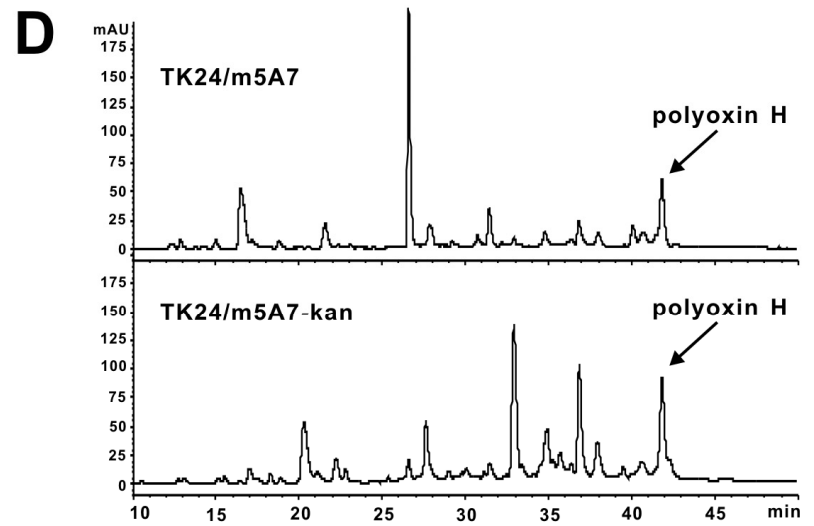

Figure S3.

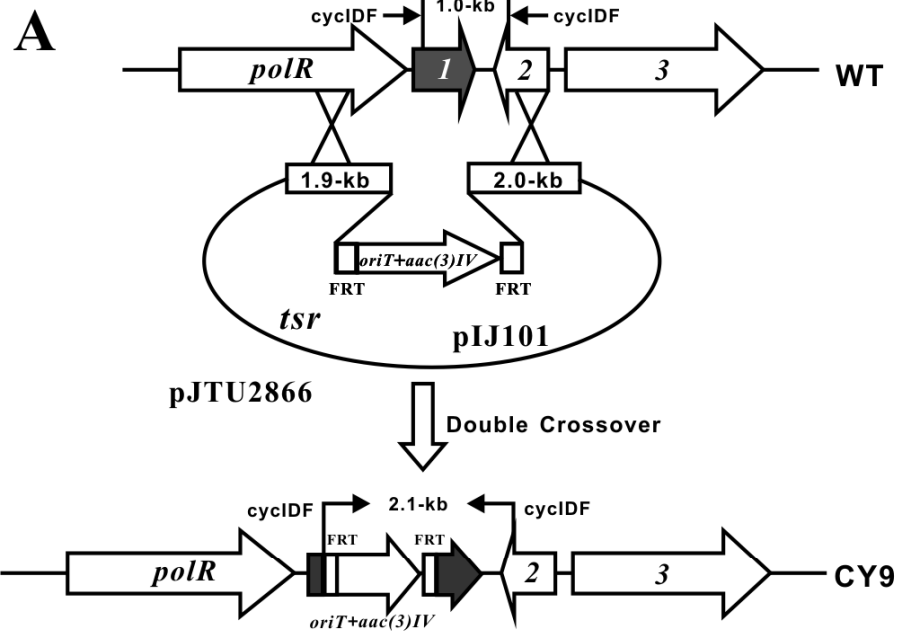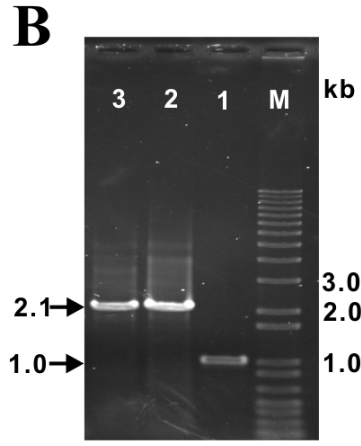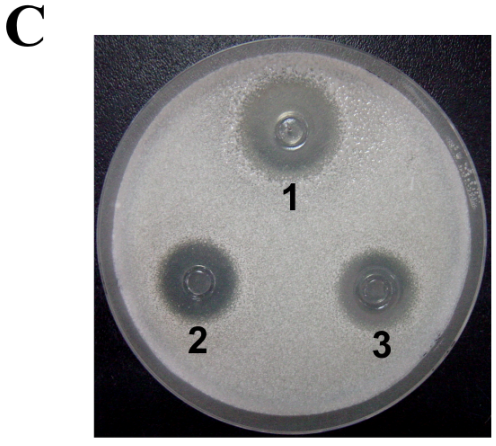

Figure S4.

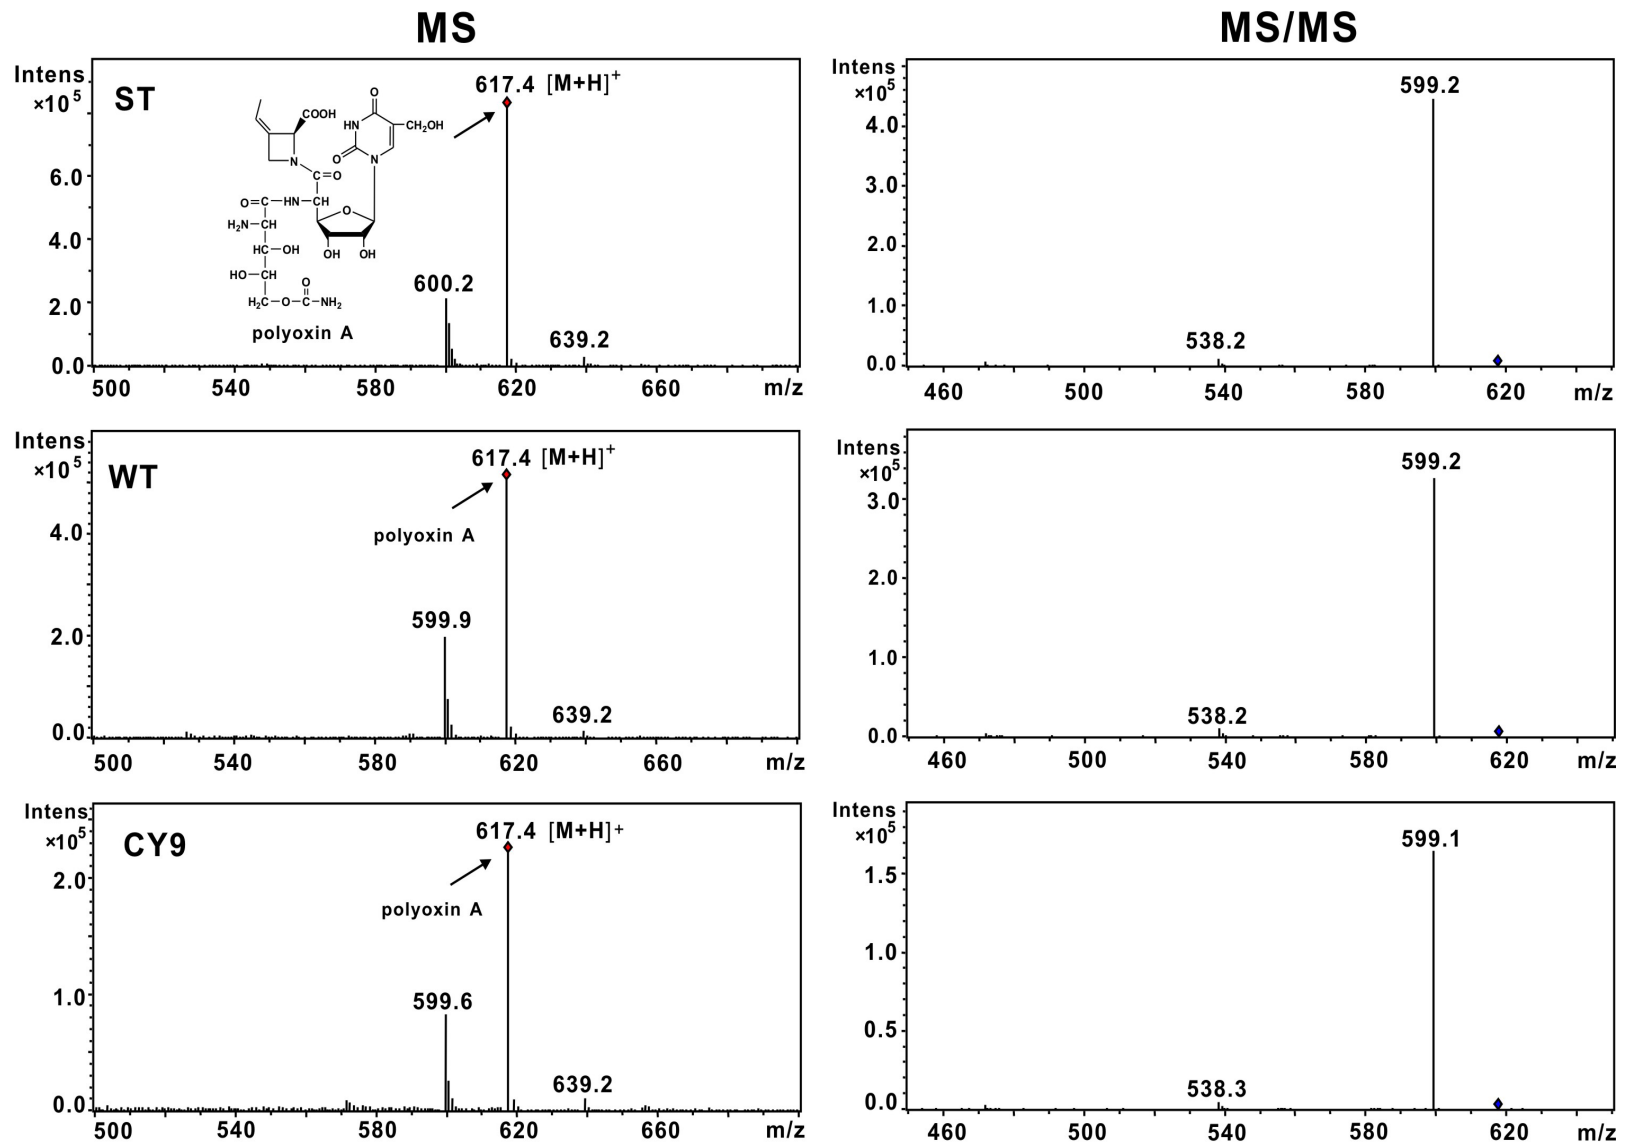

**Figure S5.**

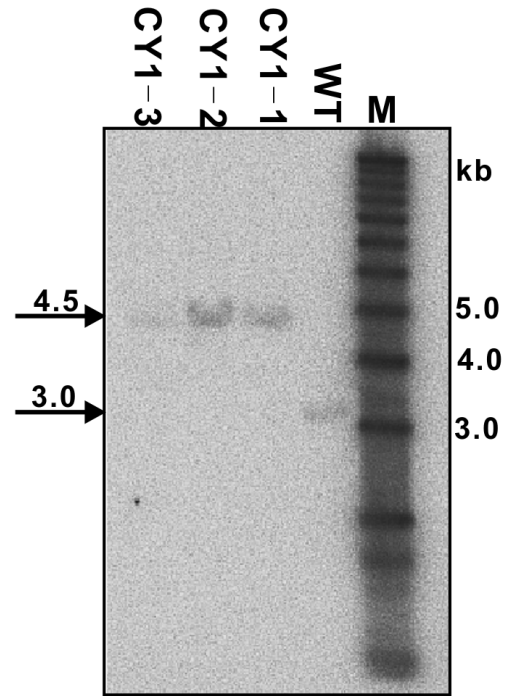

Figure S6.

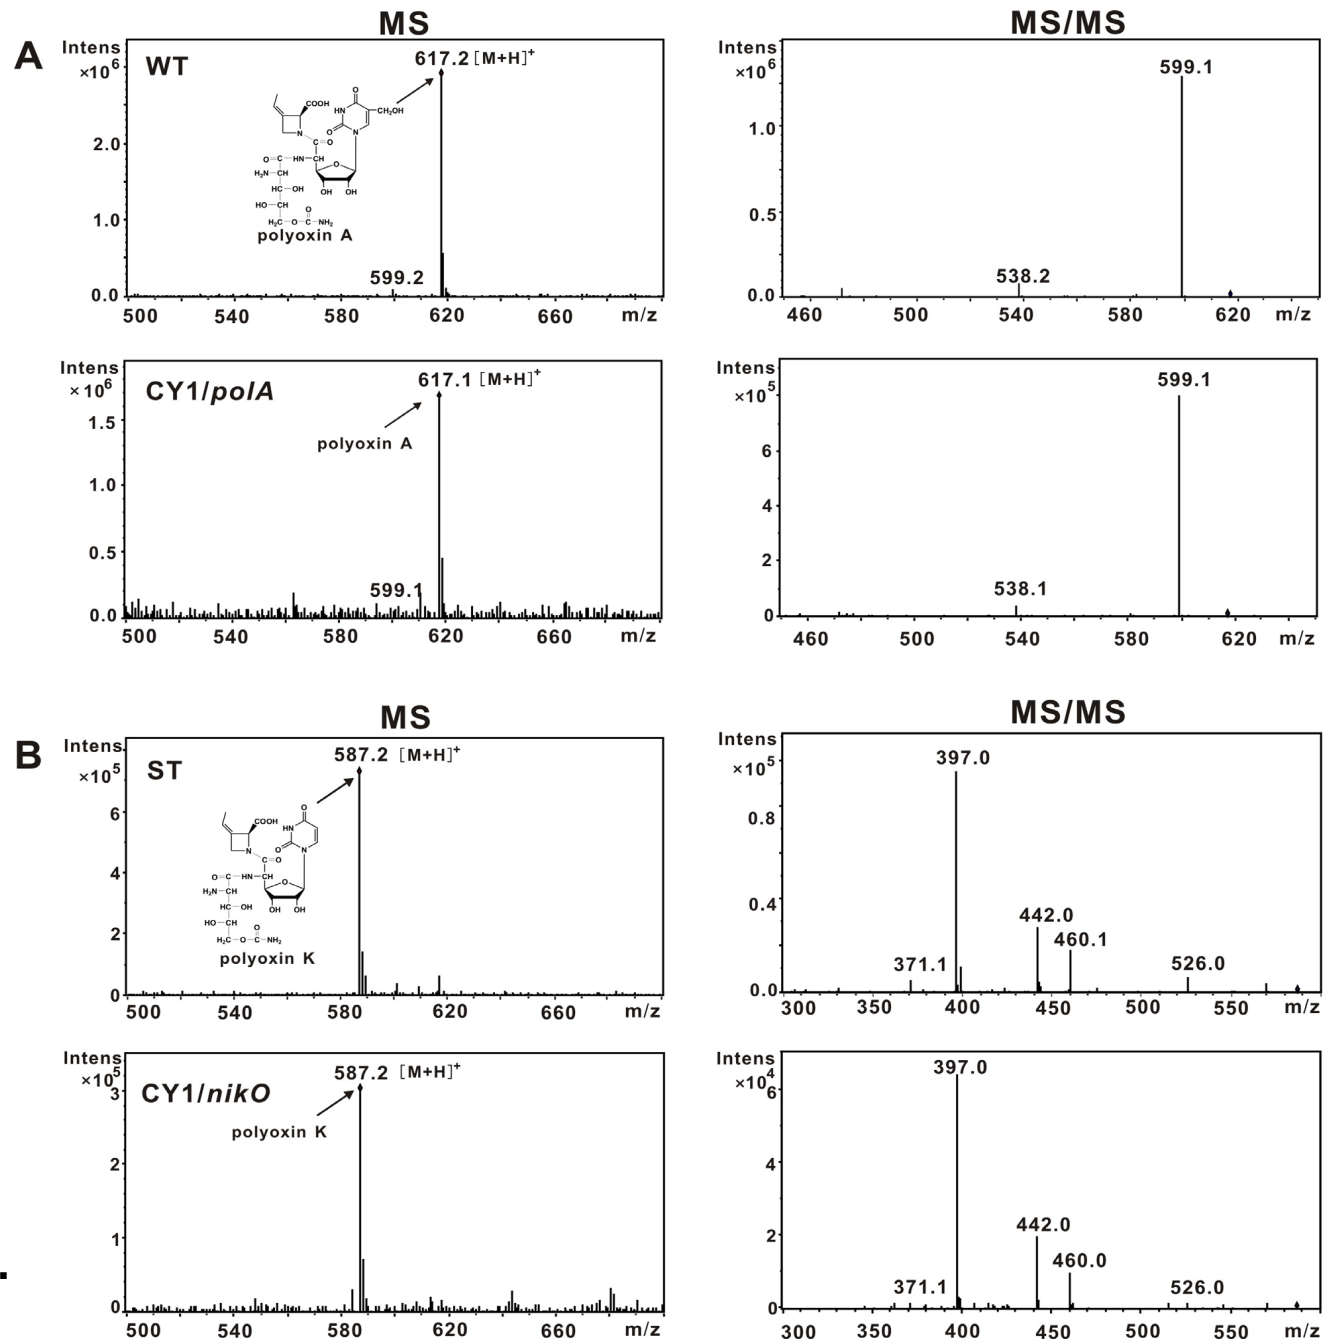

Figure S7.

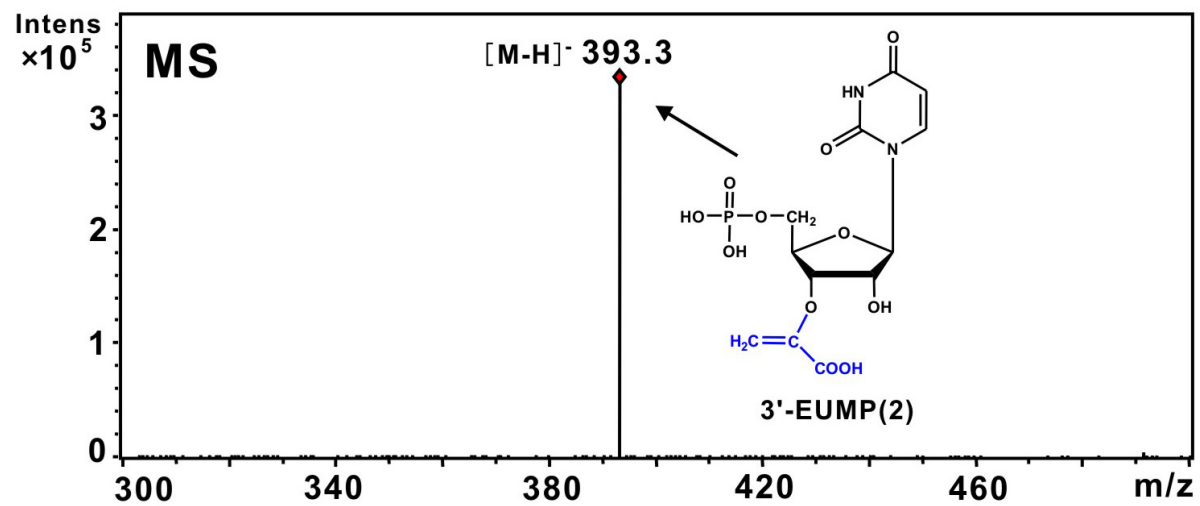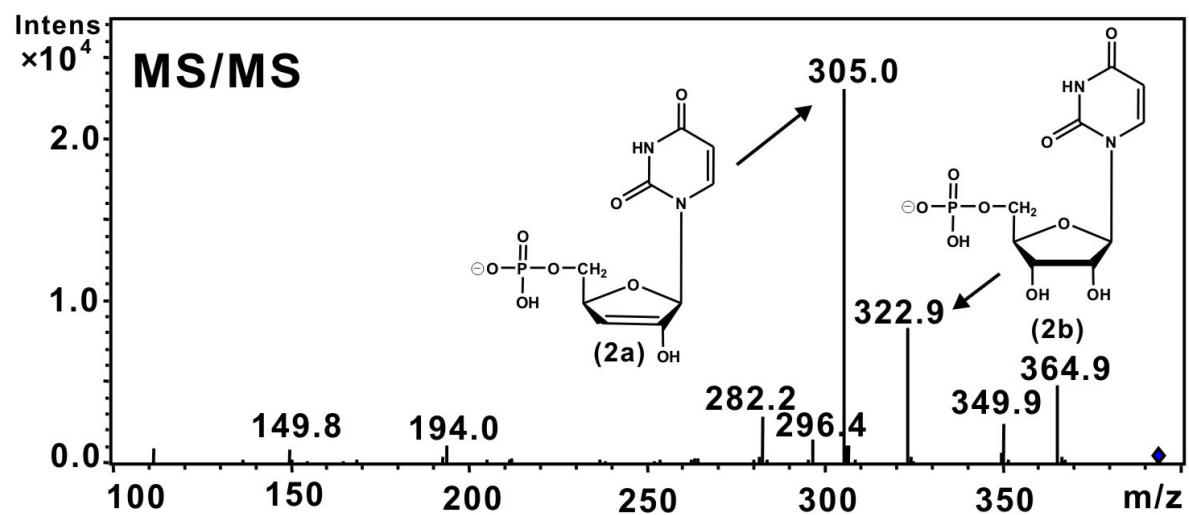

Figure S8.



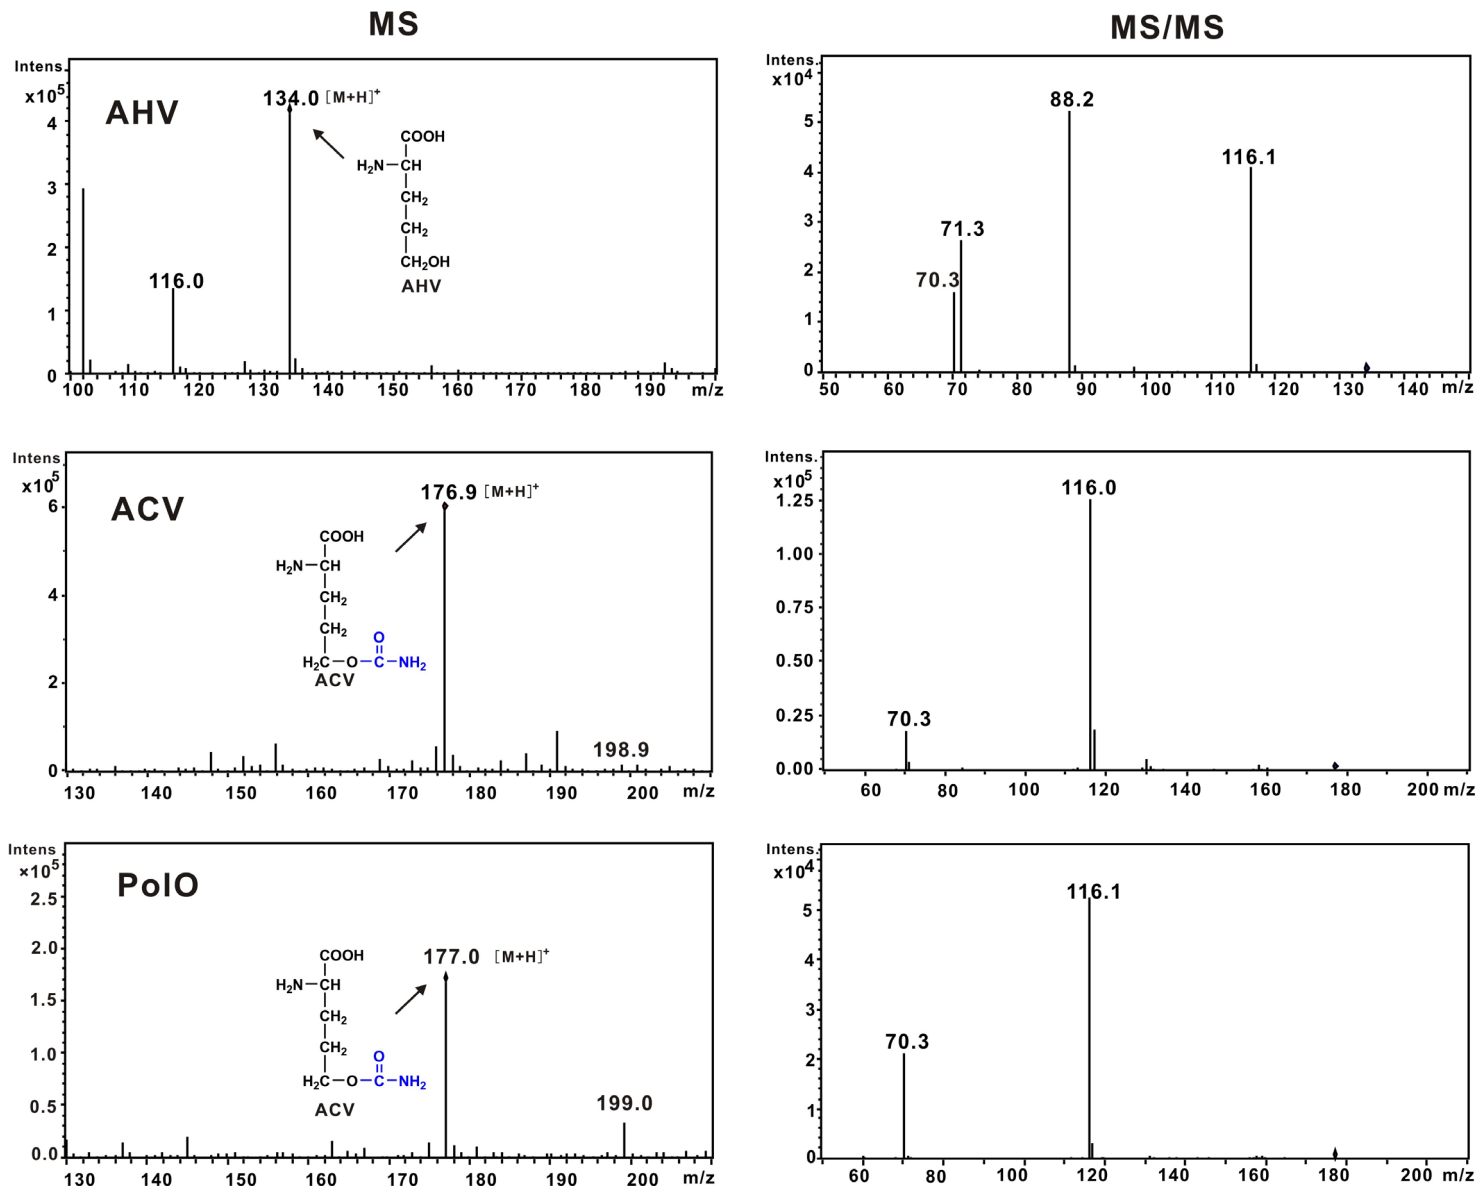

**Figure S9.**

Supplement: M807534200_2.pdf [file M807534200_2.pdf]
